# Supplementary material for: The breakdown of both strange metal and superconducting states at a pressure-induced quantum critical point in iron-pnictide superconductors
Source: PubMed Central journal article supplement (PMC10229619; doi:10.1038/s41467-023-38763-4), 2023-05-30
Supplement: 41467_2023_38763_MOESM1_ESM.pdf [file 41467_2023_38763_MOESM1_ESM.pdf]

**Supplementary Information for “The breakdown of both strange metal and  
superconducting states at a pressure-induced quantum critical point  
in iron-pnictide superconductors”**

Shu Cai<sup>1</sup>, Jinyu Zhao<sup>1,2</sup>, Ni Ni<sup>3,4</sup>, Jing Guo<sup>1,5</sup>, Run Yang<sup>1</sup>, Pengyu Wang<sup>1,2</sup>, Jinyu Han<sup>1,2</sup>, Sijin Long<sup>1,2</sup>,  
Yazhou Zhou<sup>1</sup>, Qi Wu<sup>1</sup>, Xianggang Qiu<sup>1,2,5</sup>, Tao Xiang<sup>1,2</sup>, Robert J Cava<sup>3</sup>, and Liling Sun<sup>1,2,5†</sup>

<sup>1</sup>*Institute of Physics, Chinese Academy of Sciences, Beijing 100190, China*

<sup>2</sup>*University of Chinese Academy of Sciences, Beijing 100190, China*

<sup>3</sup>*Department of Chemistry, Princeton University, Princeton, New Jersey 08544, USA*

<sup>4</sup>*Department of Physics and Astronomy, UCLA, Los Angeles, CA 90095, USA*

<sup>5</sup>*Songshan Lake Materials Laboratory, Dongguan, Guangdong 523808, China*

Correspondence and requests for materials should be addressed to L.S. ([llsun@iphy.ac.cn](mailto:llsun@iphy.ac.cn))

**Extended data**

(1) Temperature dependence of resistance at different pressures and corresponding fits for the sample #2

We performed the same high-pressure measurements on the 1048 superconductor (here we defined it as the sample #2) that was cut from different batches. As shown in Fig. S1, the resistance as a function of temperature for the sample #2 exhibits a similar behavior to that of the sample #1 (Fig.2).

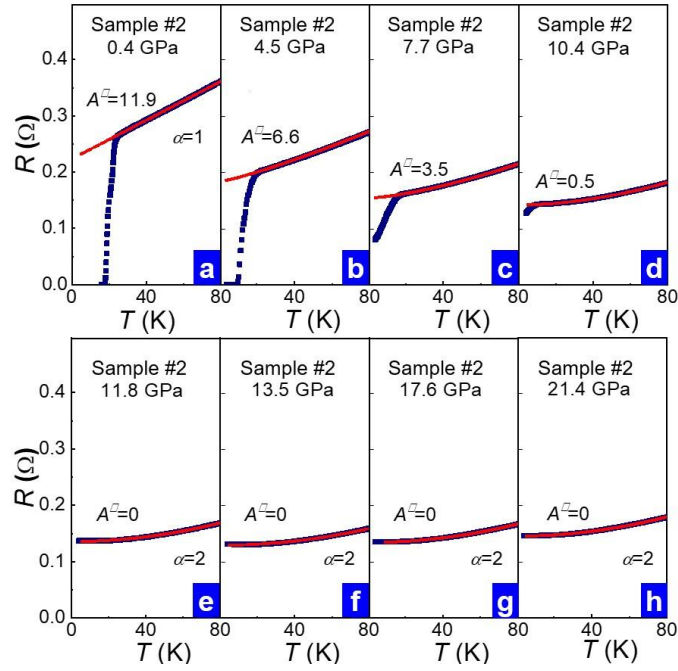

Fig.S1 High-pressure resistance as a function of temperature at different pressures for the sample #2 and corresponding fits by the form of  $R = R_0' + A'T + B'T^2$  below the quantum critical point (a-d) and above quantum critical point (e-h).

(2) Temperature dependence of  $\alpha$  below the critical pressure (quantum critical point)

The temperature dependence of  $\alpha$  is plotted through a logarithmic derivative ( $\alpha = d \log(R-R_0)/d \log T$ ) for the sample #1 and #4 (Fig.S2). It is seen that, the temperature dependence of  $\alpha$  does not display a typical quantum critical fan below the critical pressure (quantum critical point), supporting that the strange metal state exists in the ambient-pressure 1048 superconductor.

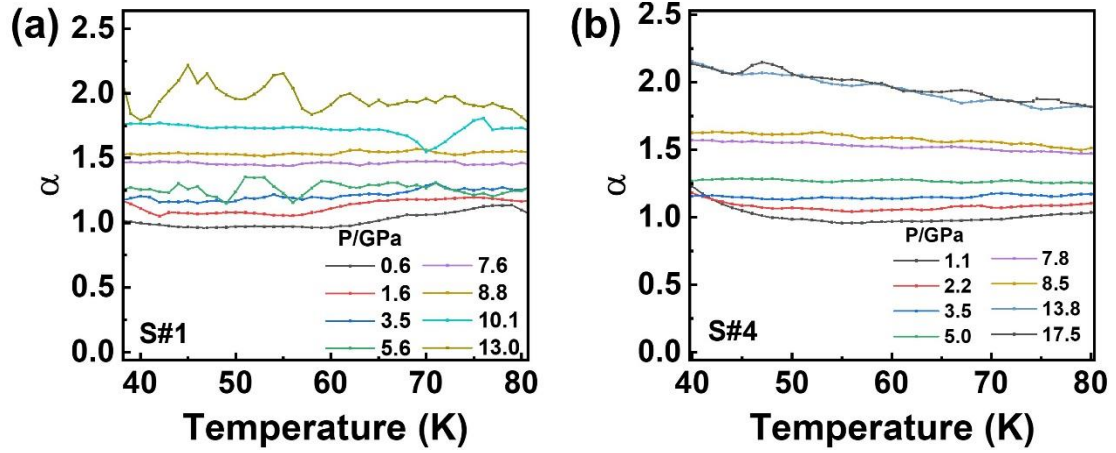

Fig.S2 The temperature dependence of  $\alpha$  for the sample #1 (a) and #4 (b), which are surrounded by the NaCl and glycerin media respectively, at different pressures.

### (3) High pressure measurements on the $\text{Sr}_{0.74}\text{Na}_{0.26}\text{Fe}_2\text{As}_2$ superconductor

To investigate the universality of the correlation between superconductivity and  $T$ -linear resistivity SM normal state, we carried out high-pressure studies on the  $\text{Sr}_{0.74}\text{Na}_{0.26}\text{Fe}_2\text{As}_2$  superconductor. We find that, when the pressure reaches 5.9 GPa and 6.6 GPa, a zero-resistivity state appears and its normal state displays a good  $T$ -linear resistivity behavior (Fig.S3a). Upon further increasing pressure to 10.4 GPa, superconductivity is completely suppressed, meanwhile, its  $A^\square$  goes to zero (Fig.S3b and S3c), indicating that application of pressure induces the concurrent breakdown of the SM normal state and SC state for the  $\text{Sr}_{0.74}\text{Na}_{0.26}\text{Fe}_2\text{As}_2$  superconductor. We also find that its  $T_c$  and  $A^\square$  obey the genetic relation of  $T_c \sim A^\square$  (see Fig.4b).

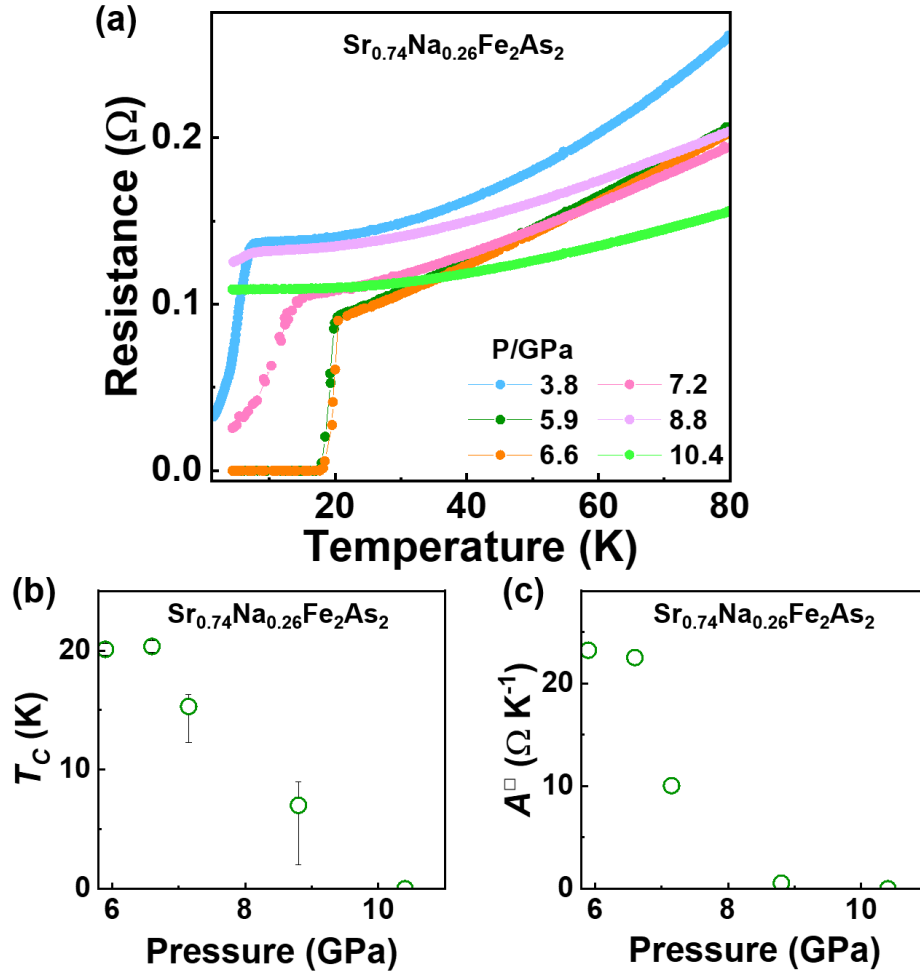

Fig.S3 High pressure properties of  $\text{Sr}_{0.74}\text{Na}_{0.26}\text{Fe}_2\text{As}_2$  superconductor. (a) Plot of resistance versus temperature measured in the pressure range of 3.8 GPa-10.4 GPa. (b) and (c) Pressure dependence of  $T_c$  and  $A^\square$ , displaying that  $T_c$  and  $A^\square$  go to zero together at 10.4 GPa. The error bars represent s.d.
